# Supplementary material for: Distribution of two isoforms of tryptophan hydroxylase in the brain of rainbow trout (Oncorhynchus mykiss). An in situ hybridization study
Source: PubMed Central journal article supplement (PMC8354878; doi:10.1007/s00429-021-02322-8), 2021-07-02

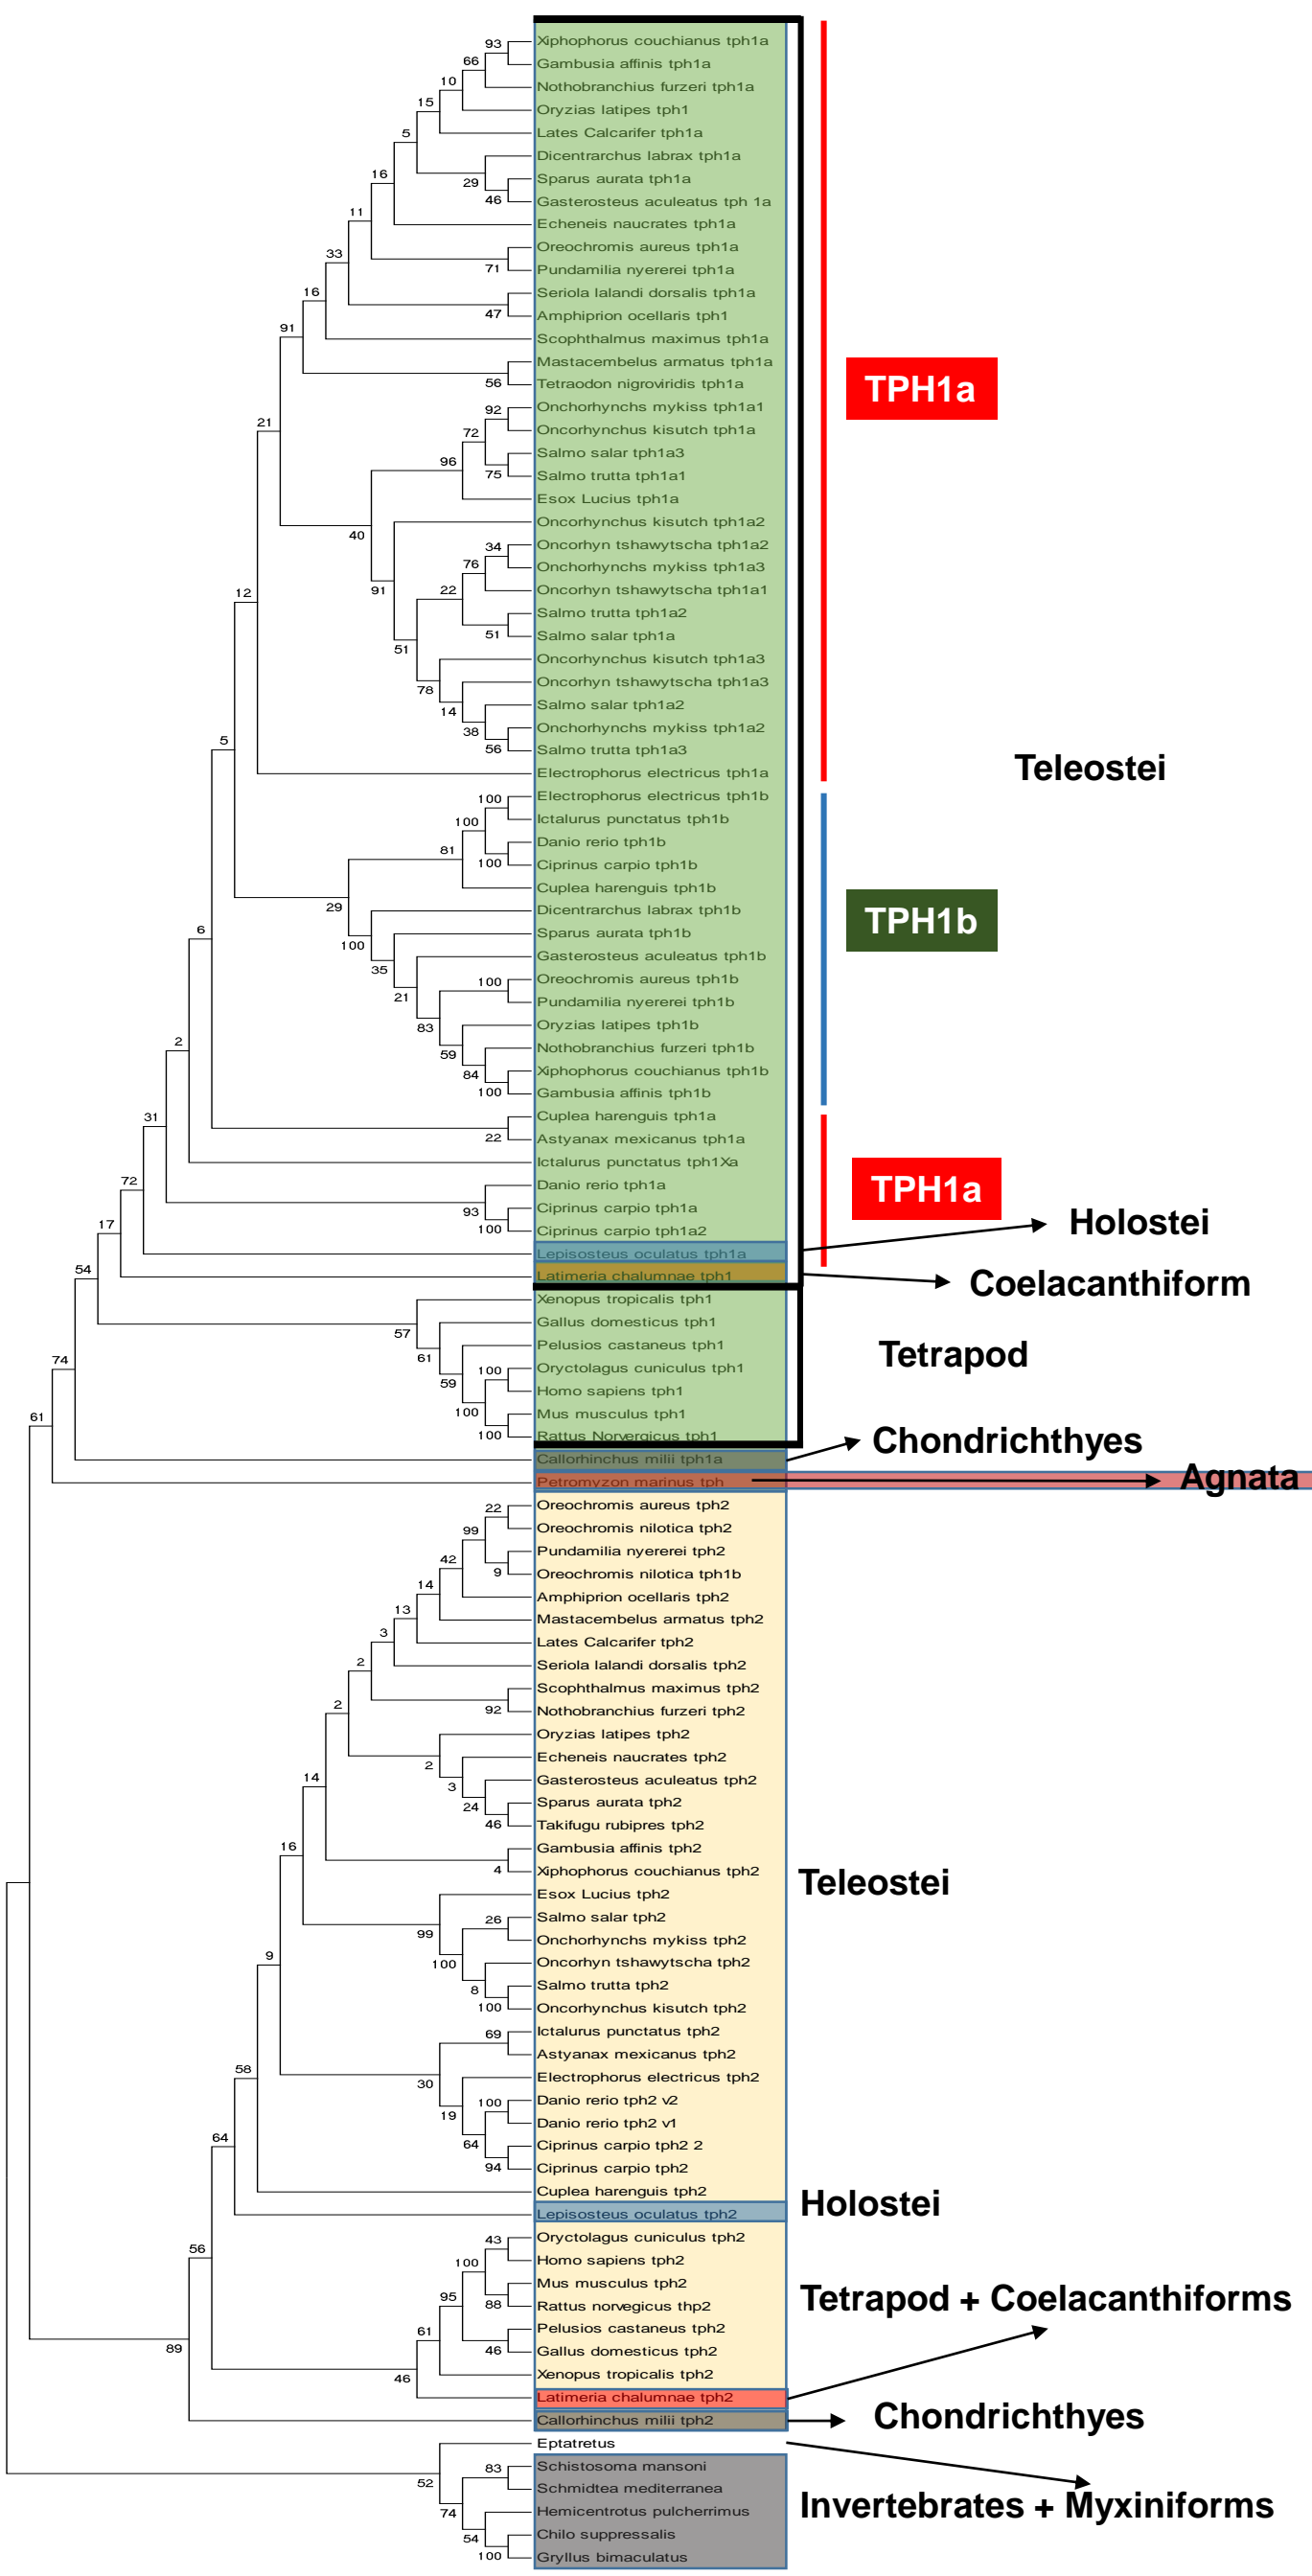

TPH1a

TPH1

Teleostei

TPH1b

TPH1a

Holostei

Coelacanthiform

Tetrapod

Chondrichthyes

Agnata

Teleostei

TPH2

Holostei

Tetrapod + Coelacanthiforms

Chondrichthyes

Invertebrates + Myxiniforms

TPH

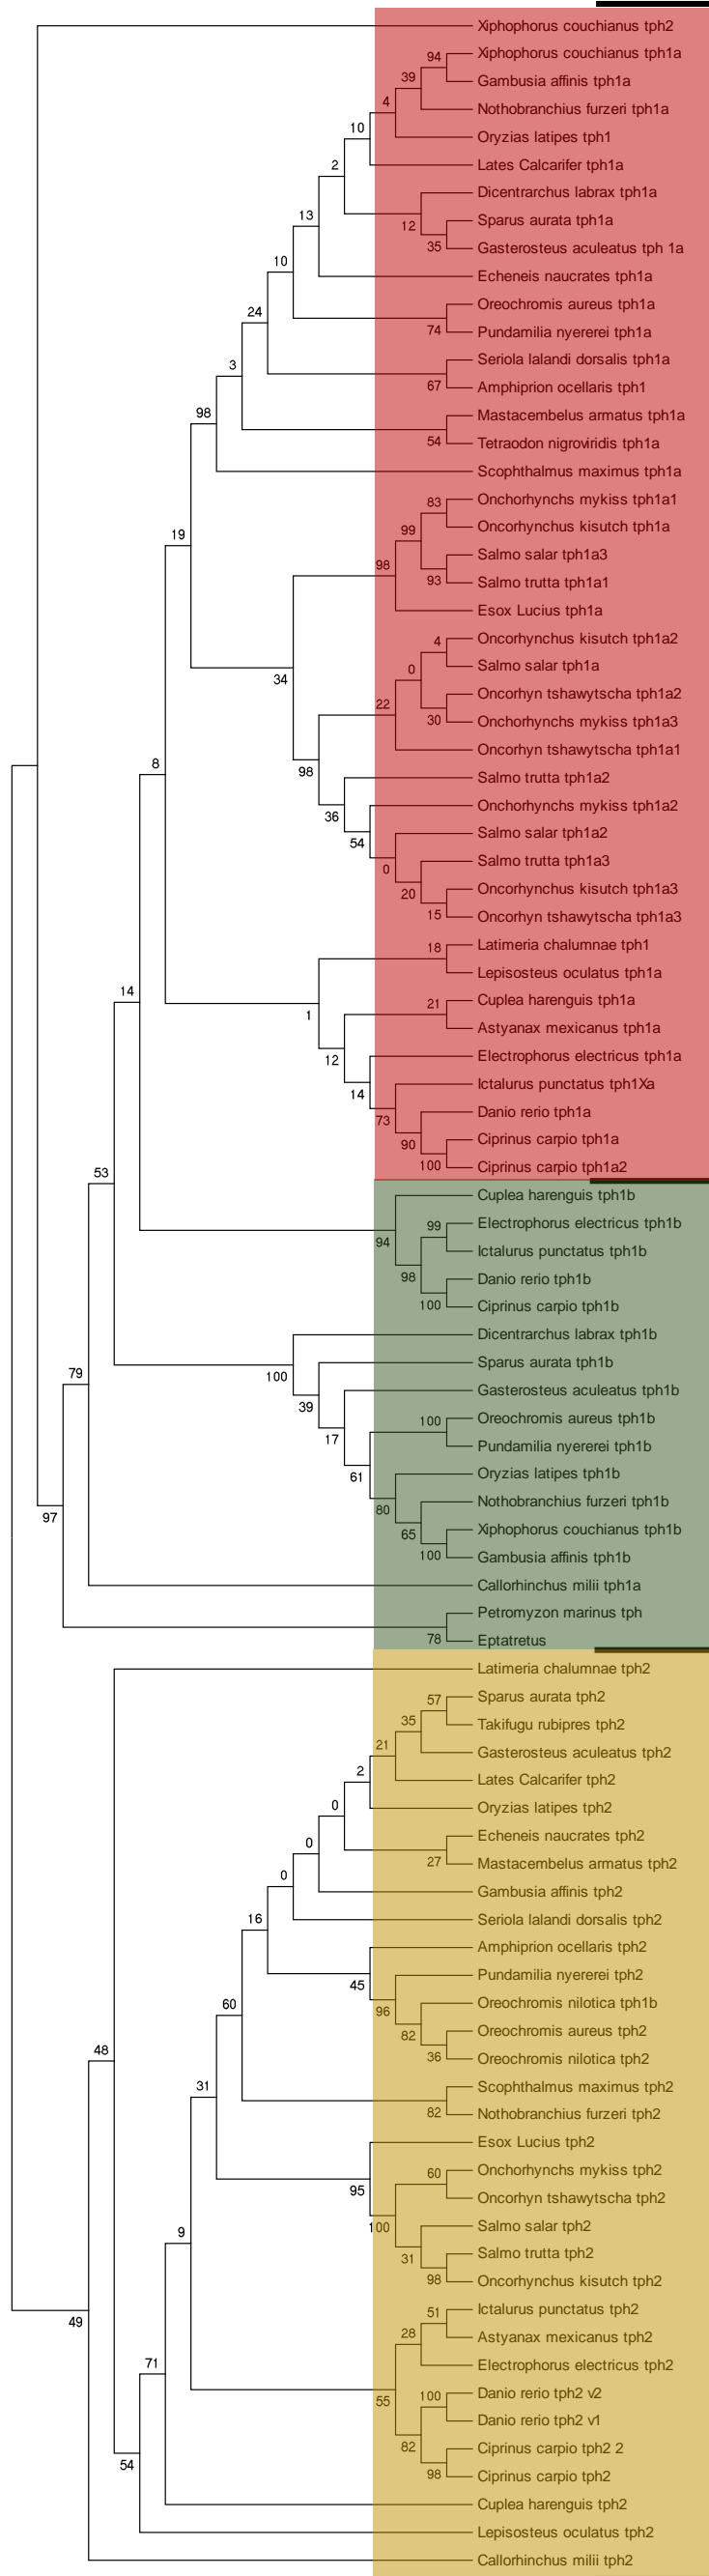

**TPH1a**

**TPH1**

**TPH1b**

**TPH2**

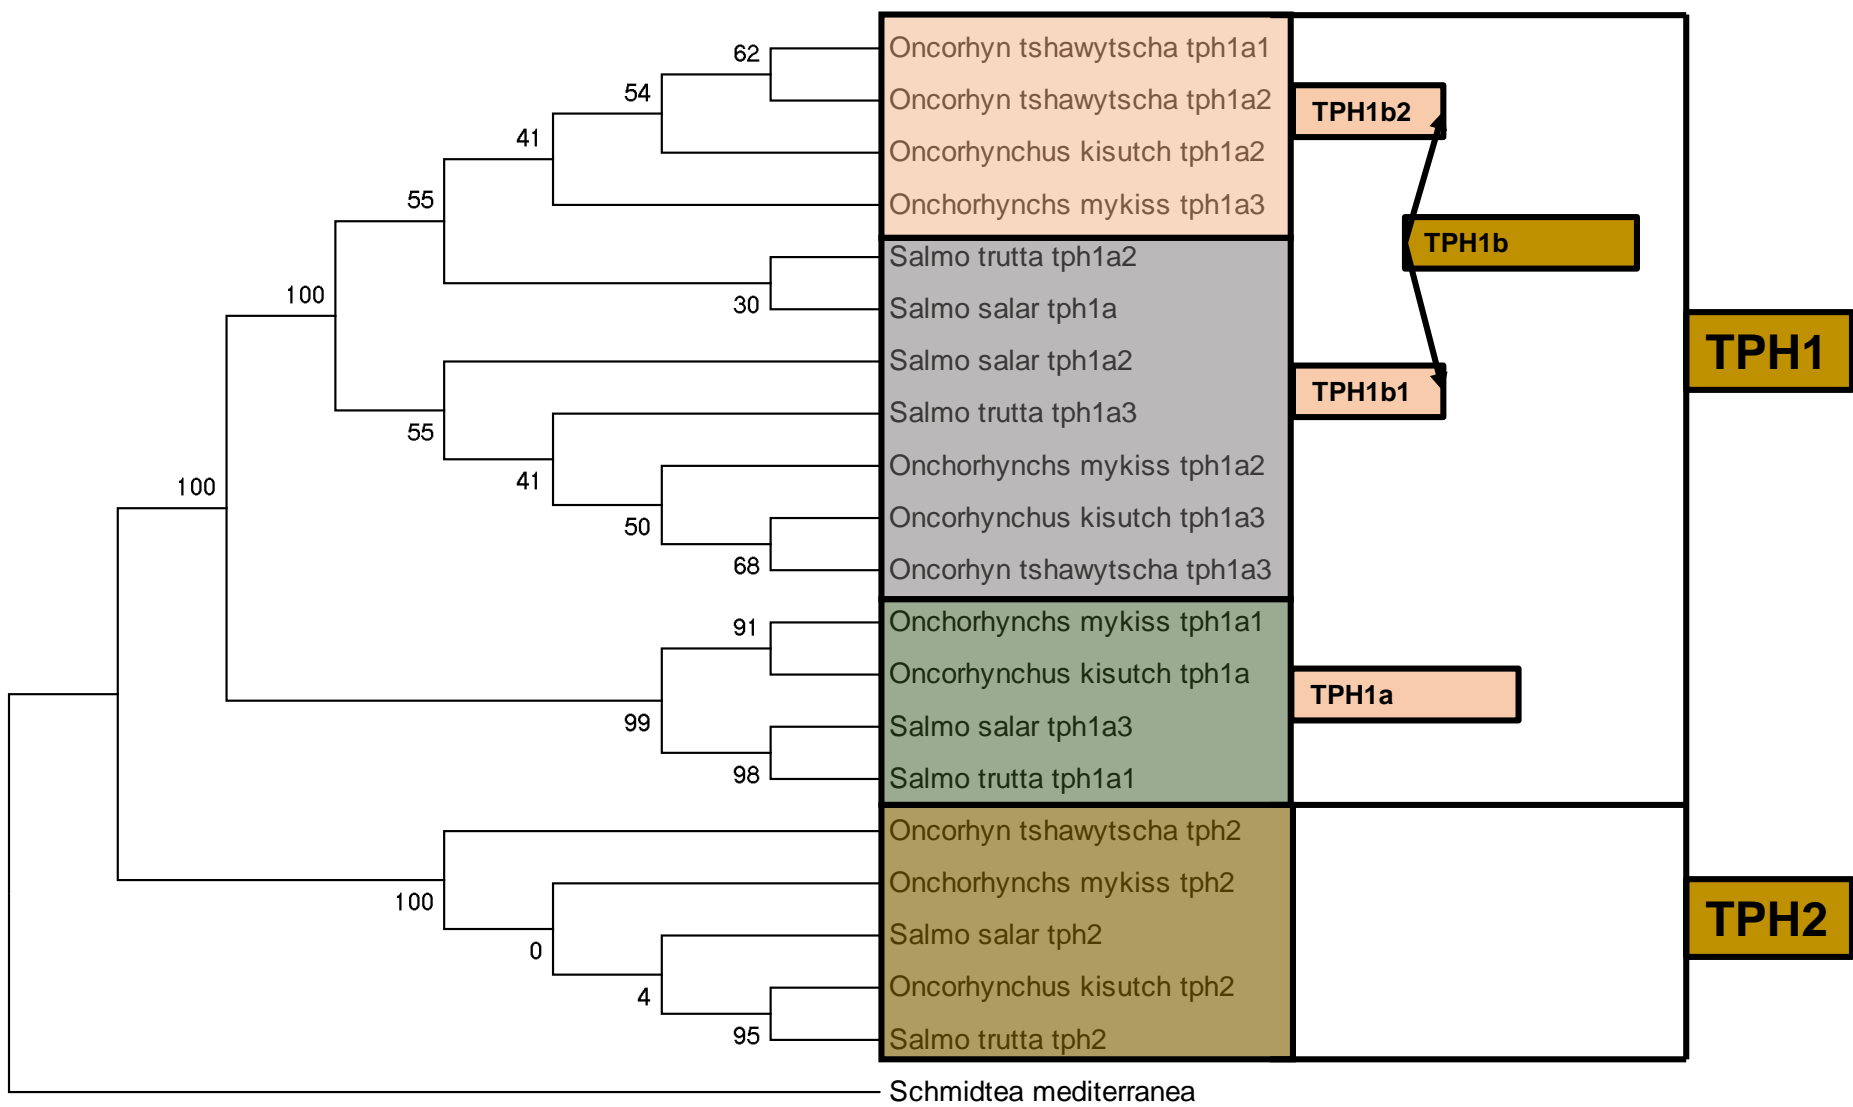

Supplement: 429_2021_2322_MOESM1_ESM.pdf [file 429_2021_2322_MOESM1_ESM.pdf]
